# Supplementary material for: Identification of Iguania Ancestral Syntenic Blocks and Putative Sex Chromosomes in the Veiled Chameleon (Chamaeleo calyptratus, Chamaeleonidae, Iguania)
Source: MDPI journal article supplement (doi:10.3390/ijms232415838), 2022-12-13
Supplement: s1 [file s1]

Table S1. Primers for PCR of *Chamaeleo calytratus* repetitive DNA monomers.

| Name     | Sequence (5'-3')       | Length, bp | T <sub>m</sub> °C |
|----------|------------------------|------------|-------------------|
| CCA_s1_F | CAAACCACATATGAGGCAATAC | 22         | 60                |
| CCA_s1_R | ACCCTCACAACTACACTATG   | 21         | 60                |
| CCA_s2_F | GACAGCCCTGTTCAATTCT    | 18         | 60                |
| CCA_s2_R | GGCTGTCAAGAATCCCTTAT   | 20         | 60                |
| CCA_s3_F | TGCTTCACTGAATGGGATAG   | 20         | 60                |
| CCA_s3_R | GTGGGAGTGTCTTGTAAATAG  | 21         | 60                |
| CCA_s4_F | CCAGCTTCTTCCACCAC      | 17         | 60                |
| CCA_s4_R | GAAGCAAGCATGGGAGAA     | 18         | 60                |
| CCA_s5_F | CCAACTCTGGGTCCATTT     | 18         | 60                |
| CCA_s5_R | CCCTAACCTAACCATACC     | 20         | 60                |

Table S2. Monomeric consensus sequencing of identified *Chamaeleo calytratus* repetitive DNAs. Primer sequences are underlined.

| Repetitive element | Sequence with underlined primers sites                                                                                                                                                                                                                                                                                                                                                                                                                                                                            |
|--------------------|-------------------------------------------------------------------------------------------------------------------------------------------------------------------------------------------------------------------------------------------------------------------------------------------------------------------------------------------------------------------------------------------------------------------------------------------------------------------------------------------------------------------|
| CCA_s1             | AGCAAACCACATATGAGGCAATACACAGTTCCTTATGGATGTTGAG<br>TTTGTTCCAAATGAGAATTCAGTACAAATATAGATCAAAAGATTTCTG<br>TTGTTCTCCTAATATGTTATACCAATACATTTGGTATATCAAATAGAA<br>GATGAGGAACATGTTTGCTAGAACTCCCTCGGTCAAACTAACAAGG<br>CCAAATTGATTGCACCTGTTGGTTAGTTCATTCTGCAGTTCATTTC<br>CTATCATAATGTGACAAAGATTAGATGCCAACATAAGTTTGCTATTA<br>CAAGGGTACACCGAATTGTGATTAAGTGAATCAGAATGGGTATTCT<br>GGAATAGCAATTCCTATGTCTGCATTGGAGATGTACATAATTCCAAG<br>ATACATTTGAAACACTGAAGCTAAAATGATGTCCCGTAACATAGTTC<br>TCTTTCCTGAAGTTATCCATAGTGTAGTTTGTGAGGGTTT |
| CCA_s2             | ATTCTTGACAGCCCTGTTCAATTCTGAGCTCTCTGCTGCCTTCCTGCATA<br>TCTATATTTAGATTTTAAAAATCATGGGAAGTTTCCCTGAAAATAAGG<br>GATTCTTGACAGCCCTGTTCAATTCTGAGCTCTCTGCTGCCTTCCTGCAT<br>ATCTATATTTAGATTTTAAAAATCATGGGAAGTTTCCCTGAAAATAAG<br>GG                                                                                                                                                                                                                                                                                            |

|        |                                                                                                                                                                                                                                                                                                                                                                                                                                                                                                                                                                                                                                                                                                                                                                                                                                                                                                                                                                                                                                                                                                                                                                                                                                                                                                                                                                                                                                                              |
|--------|--------------------------------------------------------------------------------------------------------------------------------------------------------------------------------------------------------------------------------------------------------------------------------------------------------------------------------------------------------------------------------------------------------------------------------------------------------------------------------------------------------------------------------------------------------------------------------------------------------------------------------------------------------------------------------------------------------------------------------------------------------------------------------------------------------------------------------------------------------------------------------------------------------------------------------------------------------------------------------------------------------------------------------------------------------------------------------------------------------------------------------------------------------------------------------------------------------------------------------------------------------------------------------------------------------------------------------------------------------------------------------------------------------------------------------------------------------------|
| CCA_s3 | <p> TACTTTTATTCTGACCAAGTGTGAAAAGATTAGTAGGAGCCACAACG<br/> TTGCTATTTCCATTCACTGAACCGGATTTTGCTTCACTGAATGGGATA<br/> <u>GCGCTGTGCGGTGTACTAGAACTTCTTTTCTTTACACTACAGTTATAG</u><br/> GGAATATCCGTATACATCCAAAACACTGCAACAAACAATGTACCATA<br/> TCAAAGTCGACTTTGCTACAGCTACCCATCGTGGTGCTAGTTGTAGTA<br/> TAGGCAAACCACAATGGAGGTCATAAACATGTGCAATATTGTATAGT<br/> ATTTTGCTCTGCTTAGAAATGAAACACAAGTAGTGAATGAGGTTTTTC<br/> CTCTTGTTTCAGCTGGTTTGACGCACTACCACATTTGCCATTTACAC<br/> AGGAGAGAAAGAACATGTTTGCTAGAATCTCCTTCGCCTAATATGA<br/> ATGATGCAAAACGATGGCACGTGTGGGTGACTTTATTTAGCAGTTC<br/> CTTTGACCAAGTGTGAGAAAGATTAGTTGCCAATGCAAGTTTGCTA<br/> <u>TTACAAGGACACTCCCACTTGTGGTTCAGCGAATGGGAAAGTGCTA</u><br/> TATTATGTACTGACATTCTTATGGACACAGTGTAGTTATTGGGAATT<br/> CCATTATACATTAAAAACCCTGAAACAACTTAATGTCAGATATCA<br/> TAGTTGTTTTGGCTATAGATACCCATAGTGCATCTTGTAGATGAGTG<br/> GGCACTCTTCATAGGAGCTTATTCGTATTCCATAAGCCAGAAAGGA<br/> ATCATGGAAAACGATGGAACCTCTTTGTGACTTCATTCTGCCGTTCA<br/> TTTTCTTCACCTGGAGTGACAAAGGCTAGAGAGCCAGGCAACATT<br/> GTTATTAACAAGGTAAAAACAATTGTGGTGCATTGAATGGGAAACG<br/> GCTGTATTATGTAATAGGAATTGTTATATCTACACTACAGTTATGGG<br/> GAATATCAGGACACATCCAAAACACTGCAACAATCTTAGTGTCCCA<br/> TATCATAGTCGTCTTGCCTAAAGCTACCCATAGTGGAGCTAGTTGAA<br/> GTATTGGCAAACCACATATAACGTGATATACAAGTCCATTATTATTT<br/> AATAATTTGGTCTACATATGAACGCGGCTGATATGTCAGATAACCA<br/> TATTTGTCATTTACACAGGAGAGGAGGAACATGTTTGCTAAAATG<br/> CTCTGCAGCAGAACTGAATCTTGTAAGGTGTGGCAAATCTTGGTG<br/> ACTTTATTGTGCTTT </p> |
| CCA_s4 | <p> TTCTG<u>CCAGCTTCTTCCACCACCCCTTCTCCCATGCTTGCTTCCCCATT</u><br/> T </p>                                                                                                                                                                                                                                                                                                                                                                                                                                                                                                                                                                                                                                                                                                                                                                                                                                                                                                                                                                                                                                                                                                                                                                                                                                                                                                                                                                                     |
| CCA_s5 | <p> CTCCTACCTGGAGAATACATGAACGATTCCCTCGCGCATGCTACTTGTTA<br/> CCTAGTGCCCGCTGGGAAATAAGGTTATATTTCAATTTCTACTGTTTTTA<br/> GTATTTATATTTAAATTGTATTTTGTATTTTTCATTGTAAATCGCCCTGA<br/> ATCACATTTTTCTTGAGTAGAGCTGGGTATTAATCTGATAAAACTAACG<br/> GAATCAAATCGAGGTTTAAGGTTAGGGATAGGTTTTGGTTTAGGGTTCG<br/> GGTTTGTCTTAAGATAGGAACAAAGGGTCAGATTCCTGAGCCATCTGCT </p>                                                                                                                                                                                                                                                                                                                                                                                                                                                                                                                                                                                                                                                                                                                                                                                                                                                                                                                                                                                                                                                                                                             |

|                                                                                                                                                                                                                                                                                                                                                                                                                                                                                                                                                                                                                                                            |
|------------------------------------------------------------------------------------------------------------------------------------------------------------------------------------------------------------------------------------------------------------------------------------------------------------------------------------------------------------------------------------------------------------------------------------------------------------------------------------------------------------------------------------------------------------------------------------------------------------------------------------------------------------|
| TTCTAGCGACTCTTTCTTGCTGCCTAGTGTCTGCTAGAAATAGTATATCG<br>CTTTCTGTGTCGTATTTTGAAC TAAGTGGCGGGTGTCGGATGCCGGGTG<br>CCGGGTGCCGGGTGCCACGTCCA ACTCTGGGTCCATTTTCAACTCTGGG<br>TAGCGAATTCGTTTGGCAAAGTGCCATTGGACAAACATGGCTGACCA<br>AGGGGGGCAGGCCAAGGGGGGGTGACC AAAGTCCGAGGGCCGGGGGC<br>CGGTGCTTTAAGTCCGTTGACAATTACTCATTGGGAAGGTGATTTTGGT<br>CAGATATCAAAGGCTAGATGCCACGGGTATGAAAAGACCGTCTGGGTG<br>ACACCATCCTGCTGATGTGCCCAAGGGAGGGTTGCCAAGTGGGGGGTG<br>TCCAAAGTCTGGGGGCCGGGGGCCGGGGCAAGGGCCGAGGGCCGAAG<br>ACCAGGGATCAAAGCCTGAGTGTTGAGGGACATTCCTAATCATGAAG<br>GTGCATTTCAACATTGCAAGACATGGCAAGTGTTGTTATGGTTATGG<br>TTATGGTTAGGGTTAGGGTTAGGGTTAGTGAGCGACGCGGGAGACGCC<br>TGCAAGT |
|------------------------------------------------------------------------------------------------------------------------------------------------------------------------------------------------------------------------------------------------------------------------------------------------------------------------------------------------------------------------------------------------------------------------------------------------------------------------------------------------------------------------------------------------------------------------------------------------------------------------------------------------------------|

Table S3. Statistic of sequencing and mapping of flow sorted chromosome-specific DNA pools of *Chamaeleo calyptatus*.

| Chromosome-specific DNA pool | # Reads | Reads, bp | # Target ACA | # Target PPL | # Target STR |
|------------------------------|---------|-----------|--------------|--------------|--------------|
| CCA1                         | 345354  | 83188216  | 49705        | 51839        | 53052        |
| CCA2                         | 304152  | 70953446  | 39872        | 42158        | 43049        |
| CCA3                         | 259350  | 62490046  | 33877        | 38762        | 39944        |
| CCA4                         | 250708  | 60979524  | 35256        | 40127        | 40524        |
| CCA5                         | 290126  | 69105853  | 37688        | 47464        | 44317        |
| CCA6                         | 289408  | 70864623  | 42473        | 49634        | 51478        |
| CCA7                         | 305316  | 75951315  | 41085        | 49699        | 62780        |
| CCA8                         | 301578  | 73654036  | 44130        | 47085        | 56034        |
| CCA9                         | 243536  | 61066427  | 39167        | 45936        | 46459        |
| CCA10,11                     | 238190  | 60845743  | 31625        | 39263        | 40912        |
| CCA12                        | 307186  | 75372625  | 34318        | 41158        | 44862        |

# Reads - Reads bp the initial number and volume of sequence reads,

# Target ACA - the number of reads mapped to AnoCar2.0 genome with MAPQ >20 after human contamination removal;

# *Target PPL* - the number of reads mapped to MUOH\_PhPlat\_1.1 genome with MAPQ >20 after human contamination removal;

# *Target STR* - the number of reads mapped to ASM1680106v1 genome with MAPQ >20 after human contamination removal;

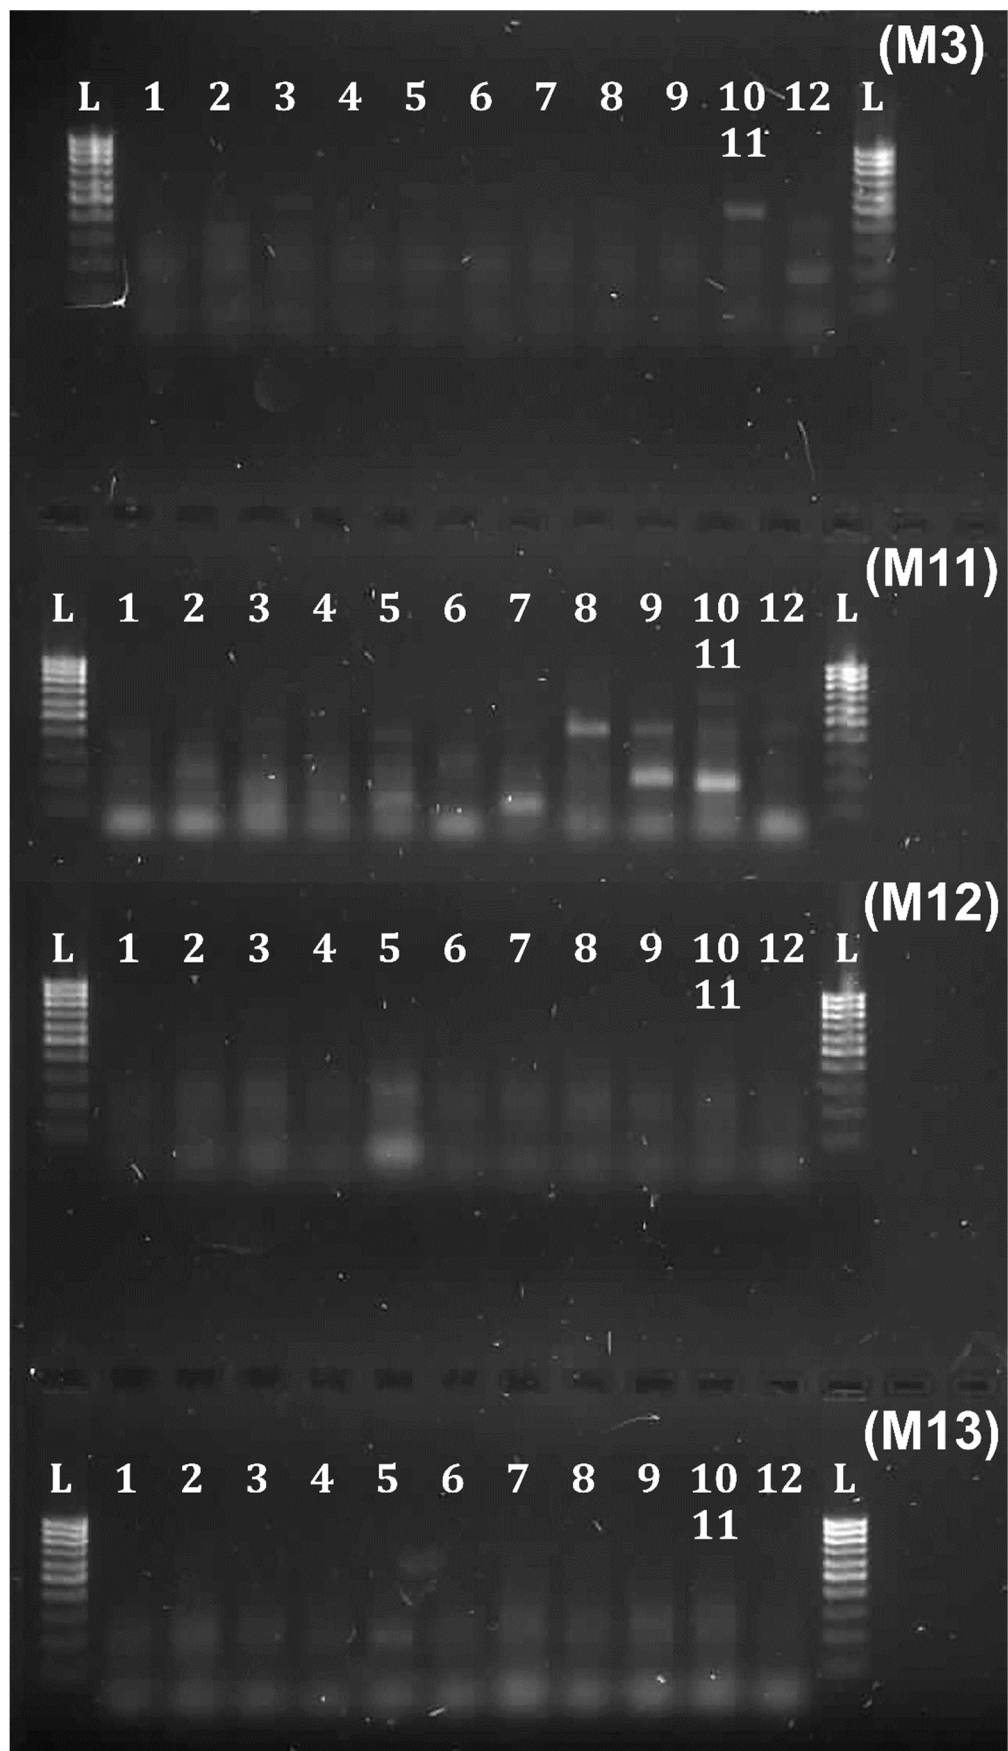

Figure S1. Agarose gel electrophoresis showing the result of PCR-assisted mapping of the male-specific RAD-seq markers in *C. calyptratus*. Numerals refer to the chromosomes, which were identified in the chromosome-specific DNA libraries prepared from *C. calyptratus* flow-sorted chromosomes, L DNA ladder.

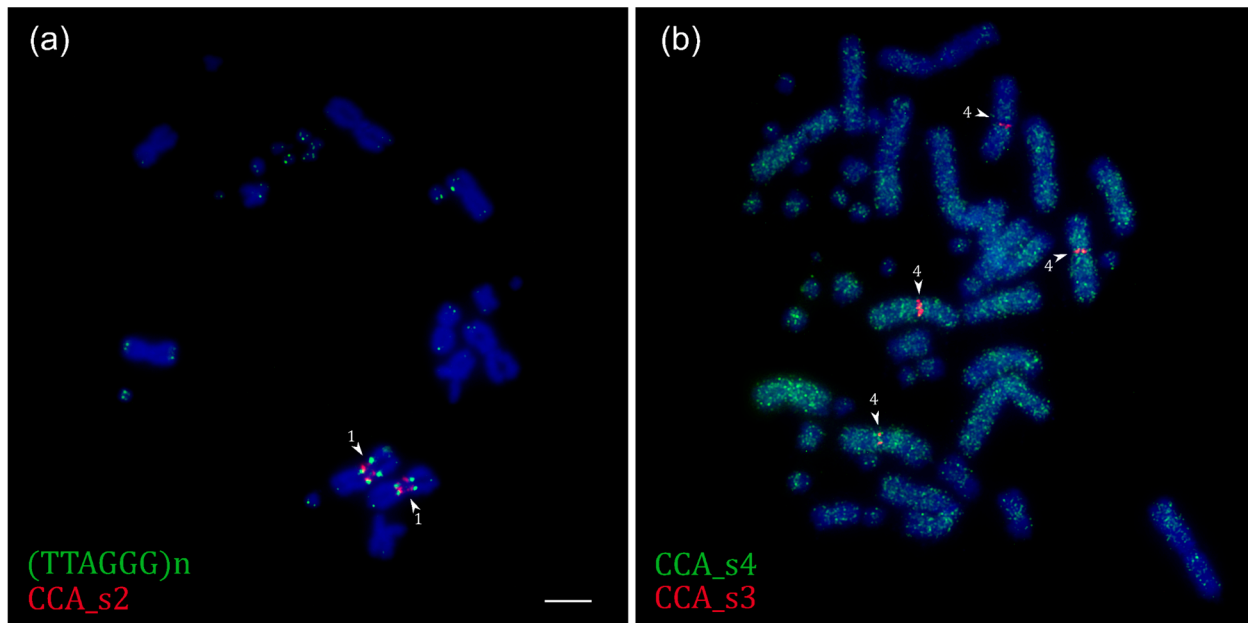

Figure S2. Fluorescent *in situ* hybridization of *C. calyptratus* repetitive element probes on its metaphase plates. Chromosomes are indicated by the arrow-heads. Colocalization of probes are shown: (a) (TTAGGG)<sub>n</sub> (green) and CCA\_s2 (red); (b) CCA\_s4 (green) and CCA\_s3 (red), this metaphase plate is 4n (48 chromosomes). Scale bar = 10 μm.

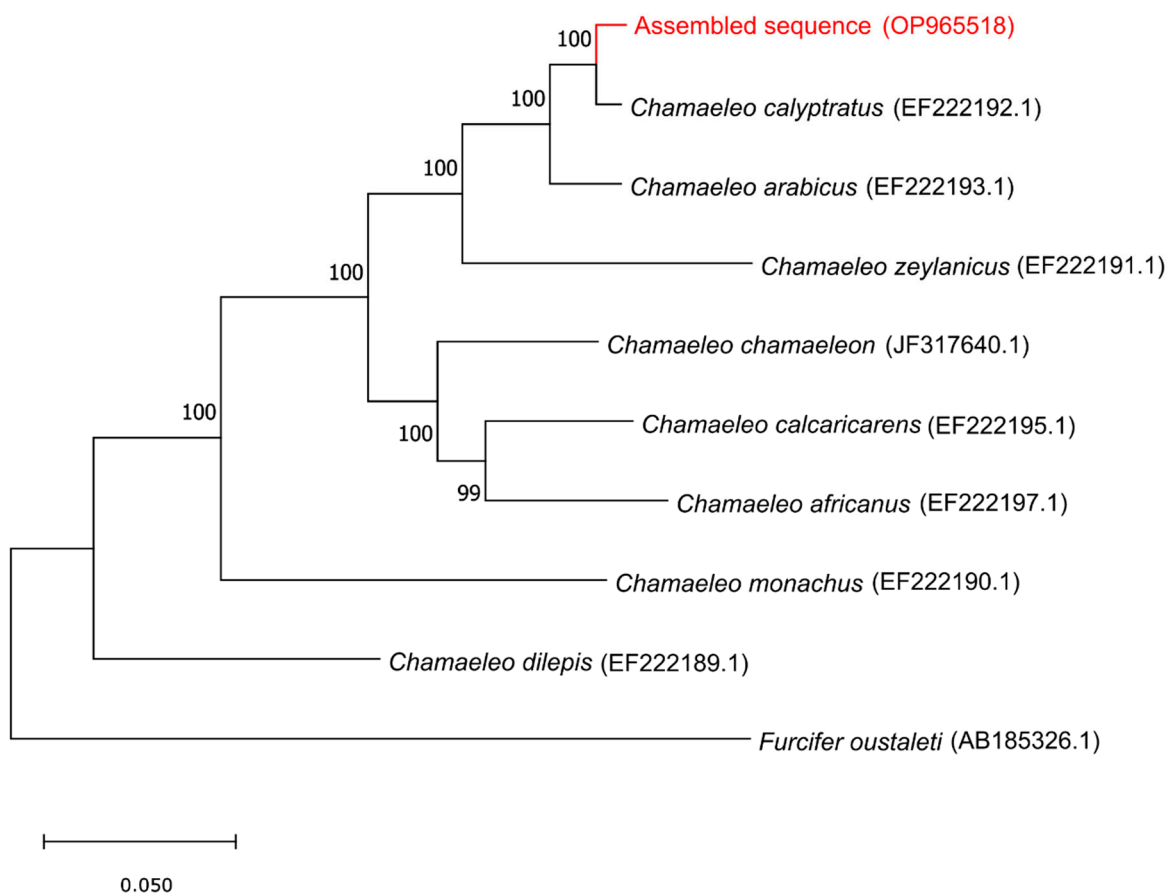

Figure S3. Phylogenetic relationship between the sample of *C. calyptratus* (red color on the tree) and *Chamaeleo* sp. The phylogenetic tree was constructed using available complete mitochondrial

DNA sequences from the NCBI Nucleotide database by the maximum likelihood method (1000 iterations) in the MEGA 11 software suite. The *Furcifer oustaleti* was used as an outgroup.
